# Supplementary material
Source: PubMed Central journal article supplement (PMC3126413)

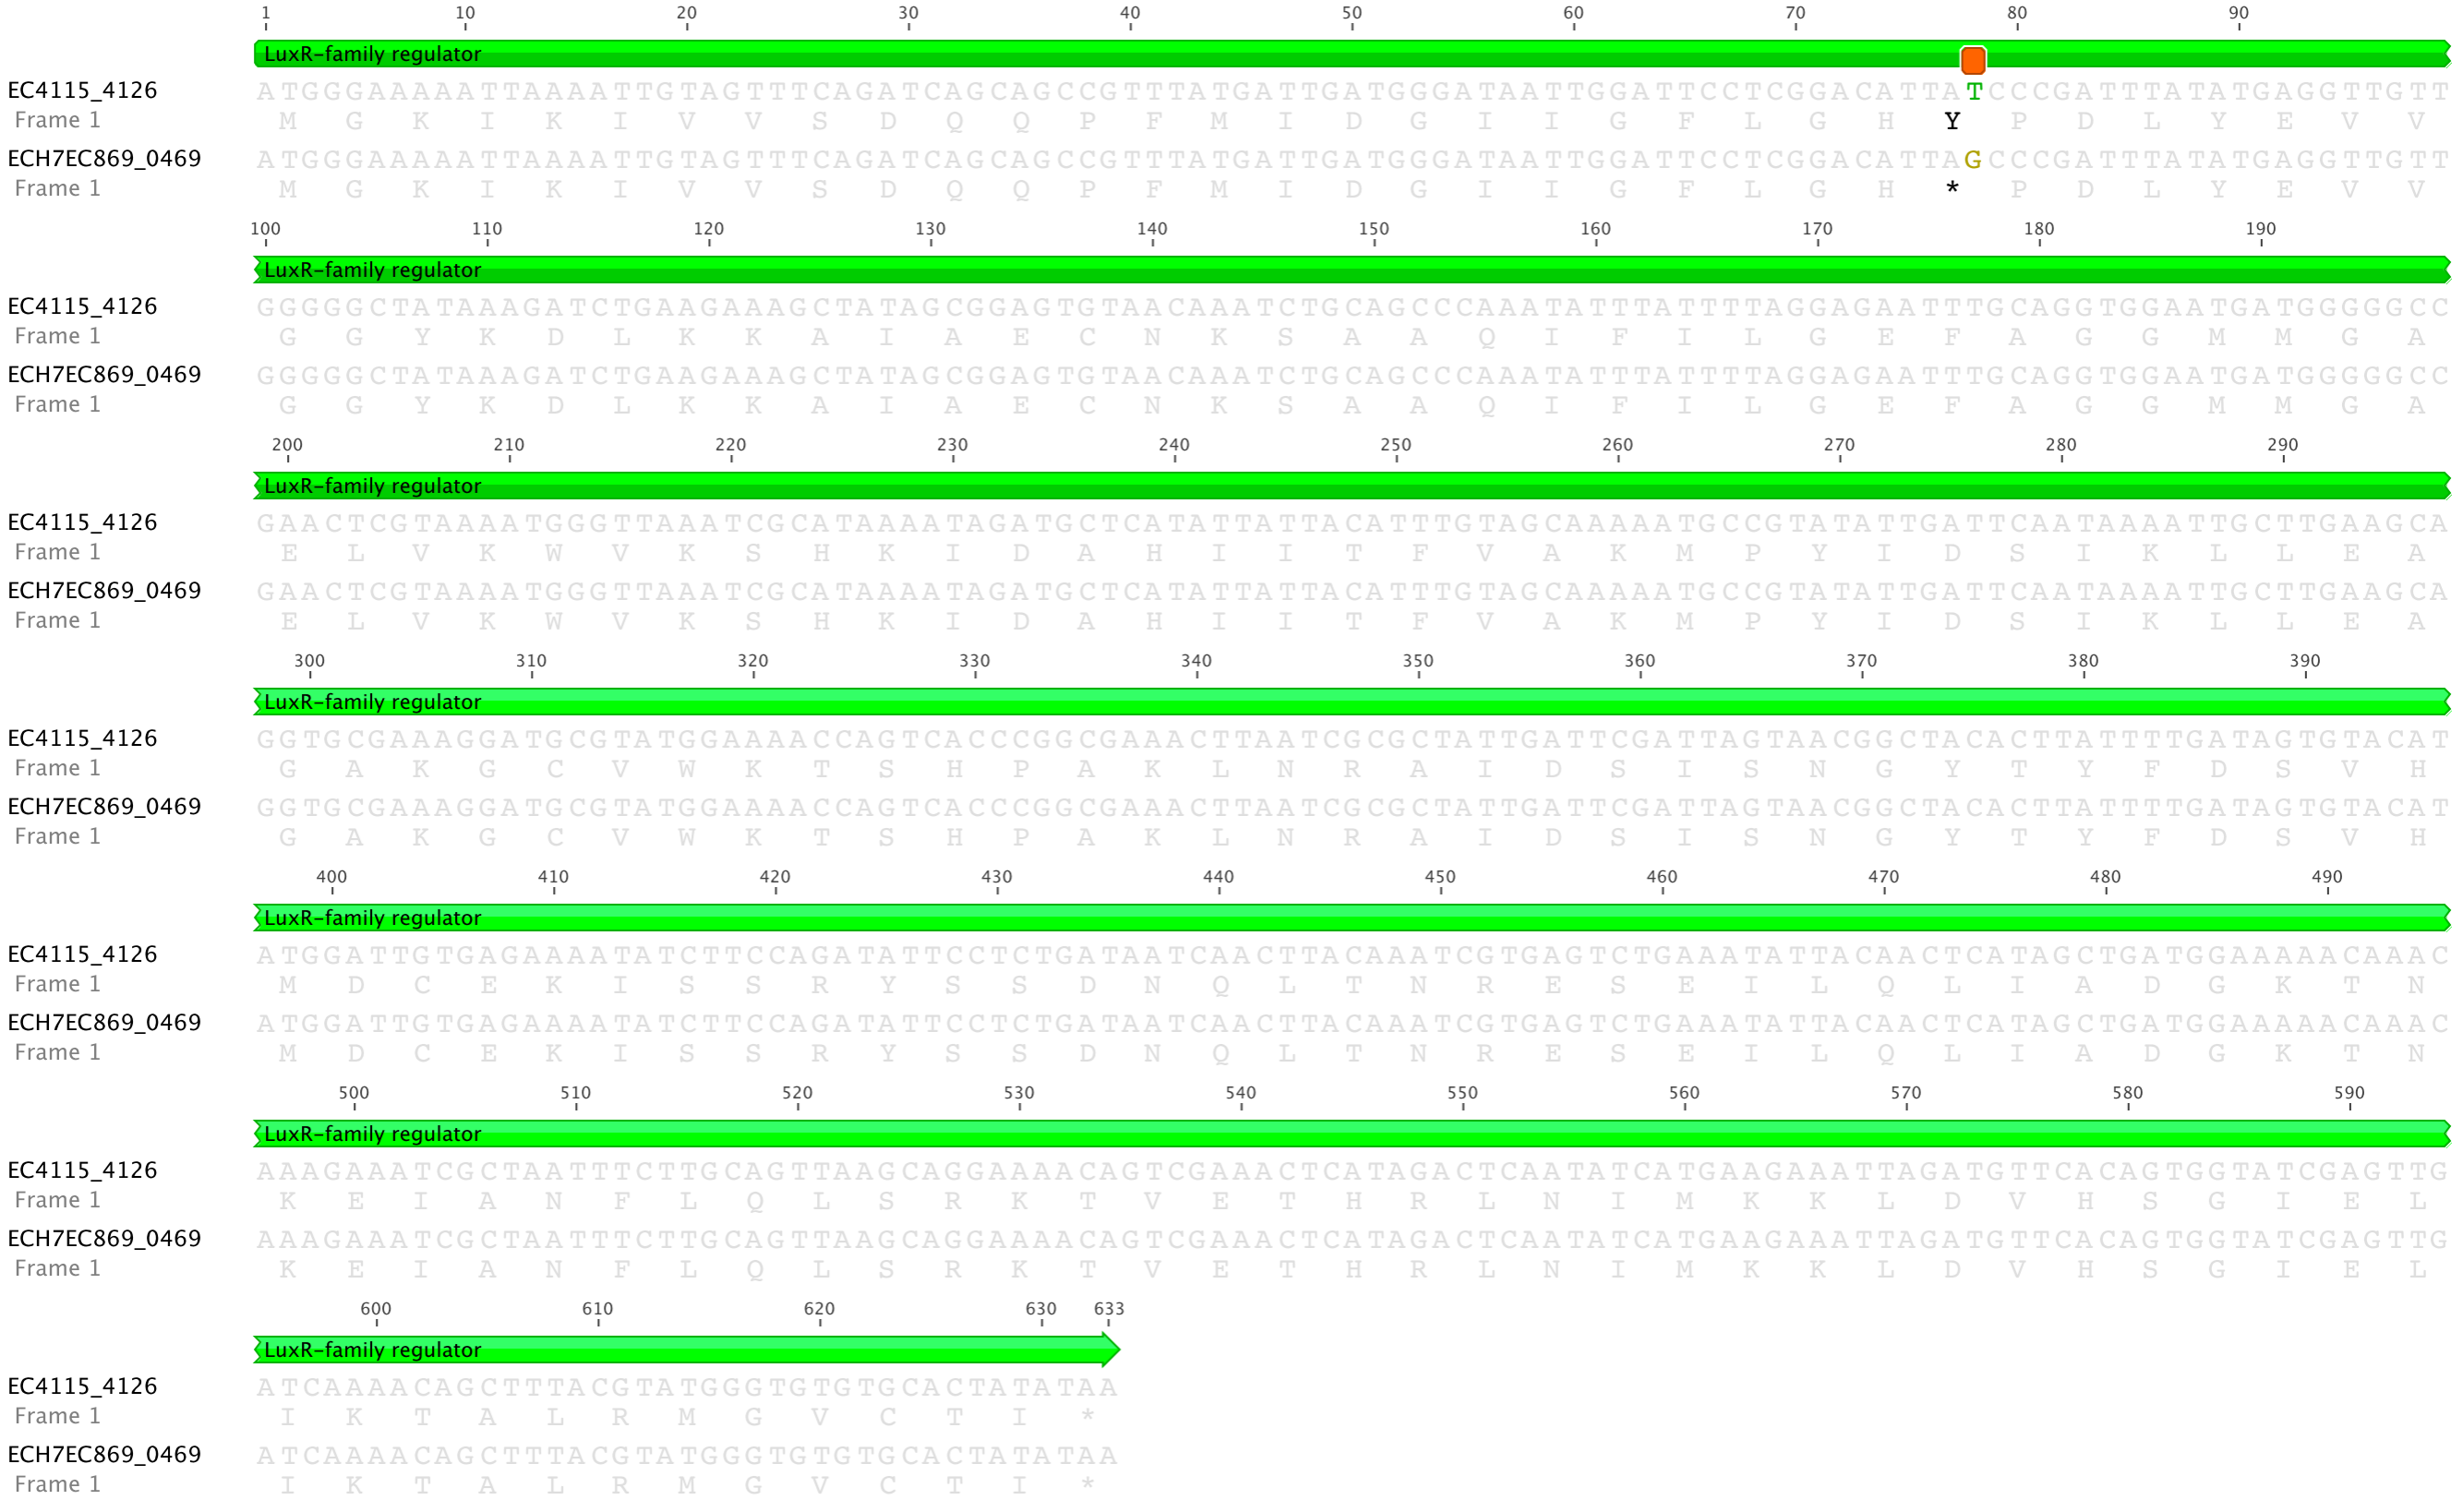

Supplement: supp_77_9_2916__2.pdf [file supp_77_9_2916__2.pdf]

Figure S5 A

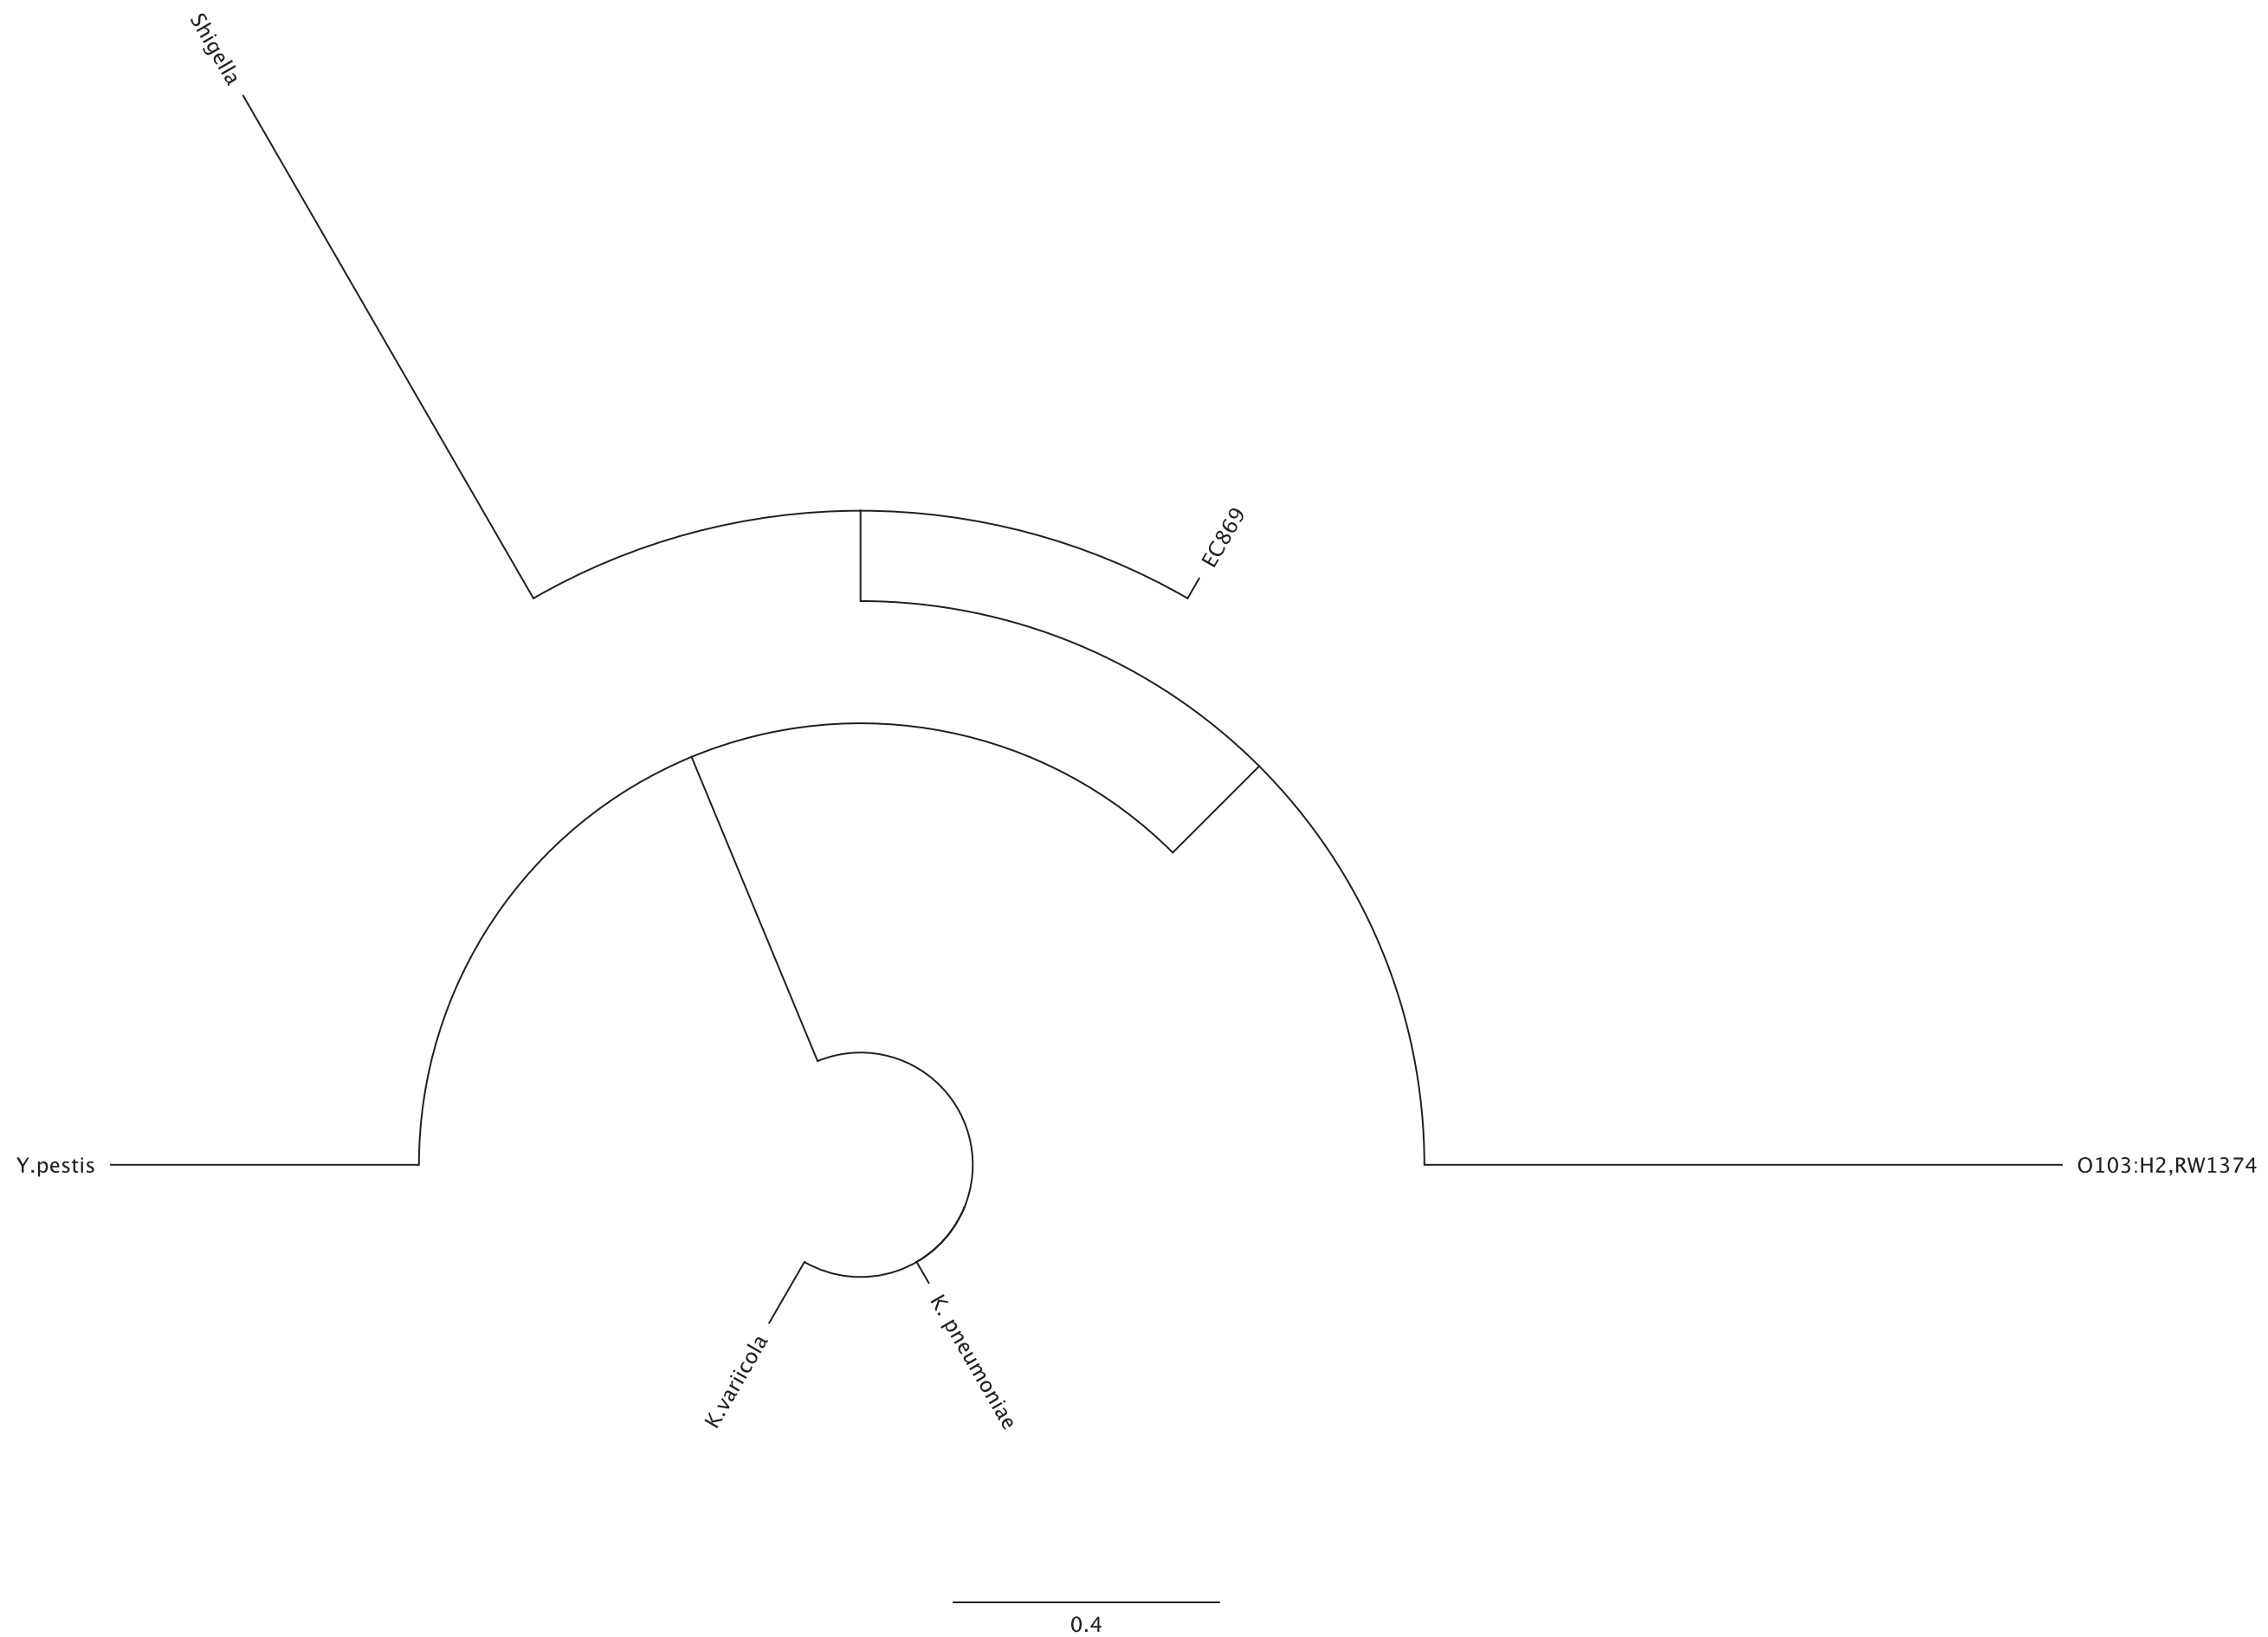



D

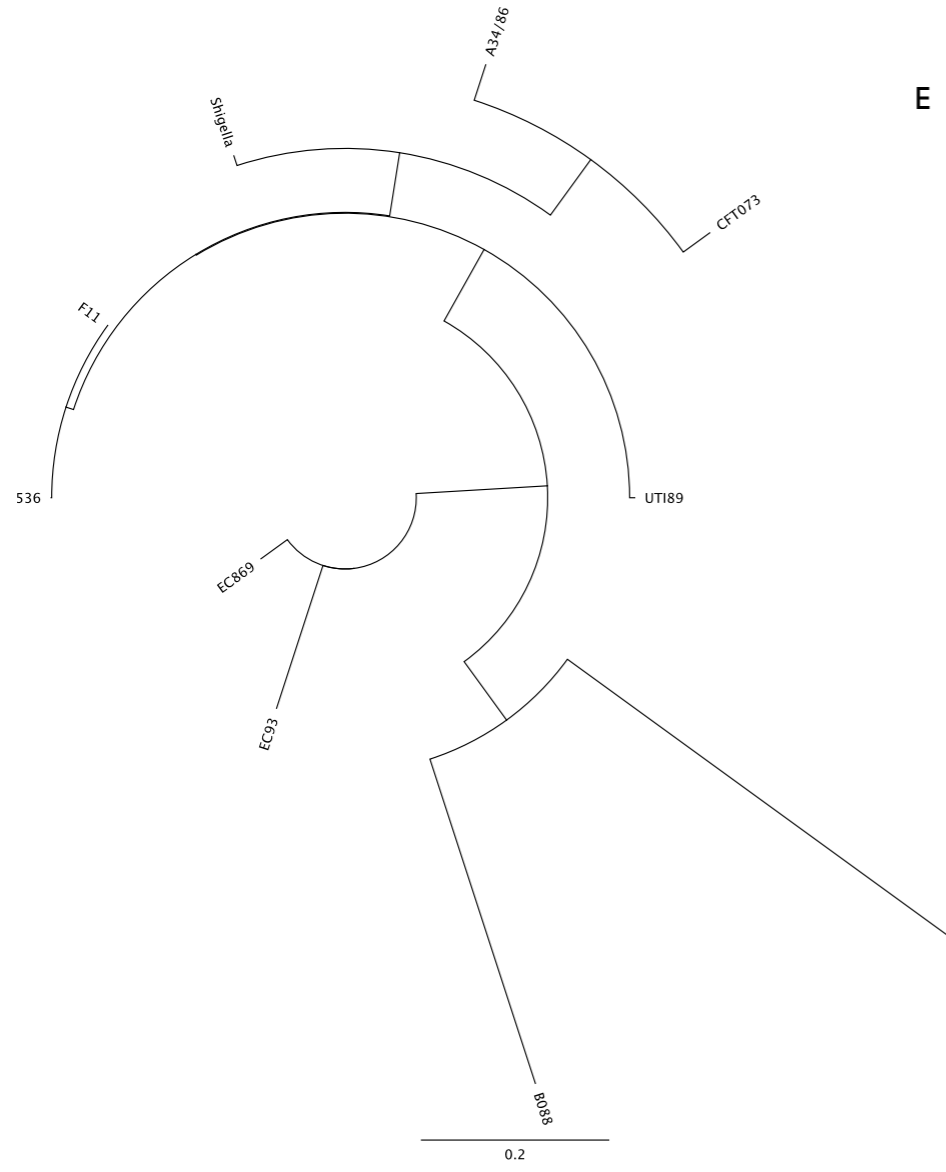

E

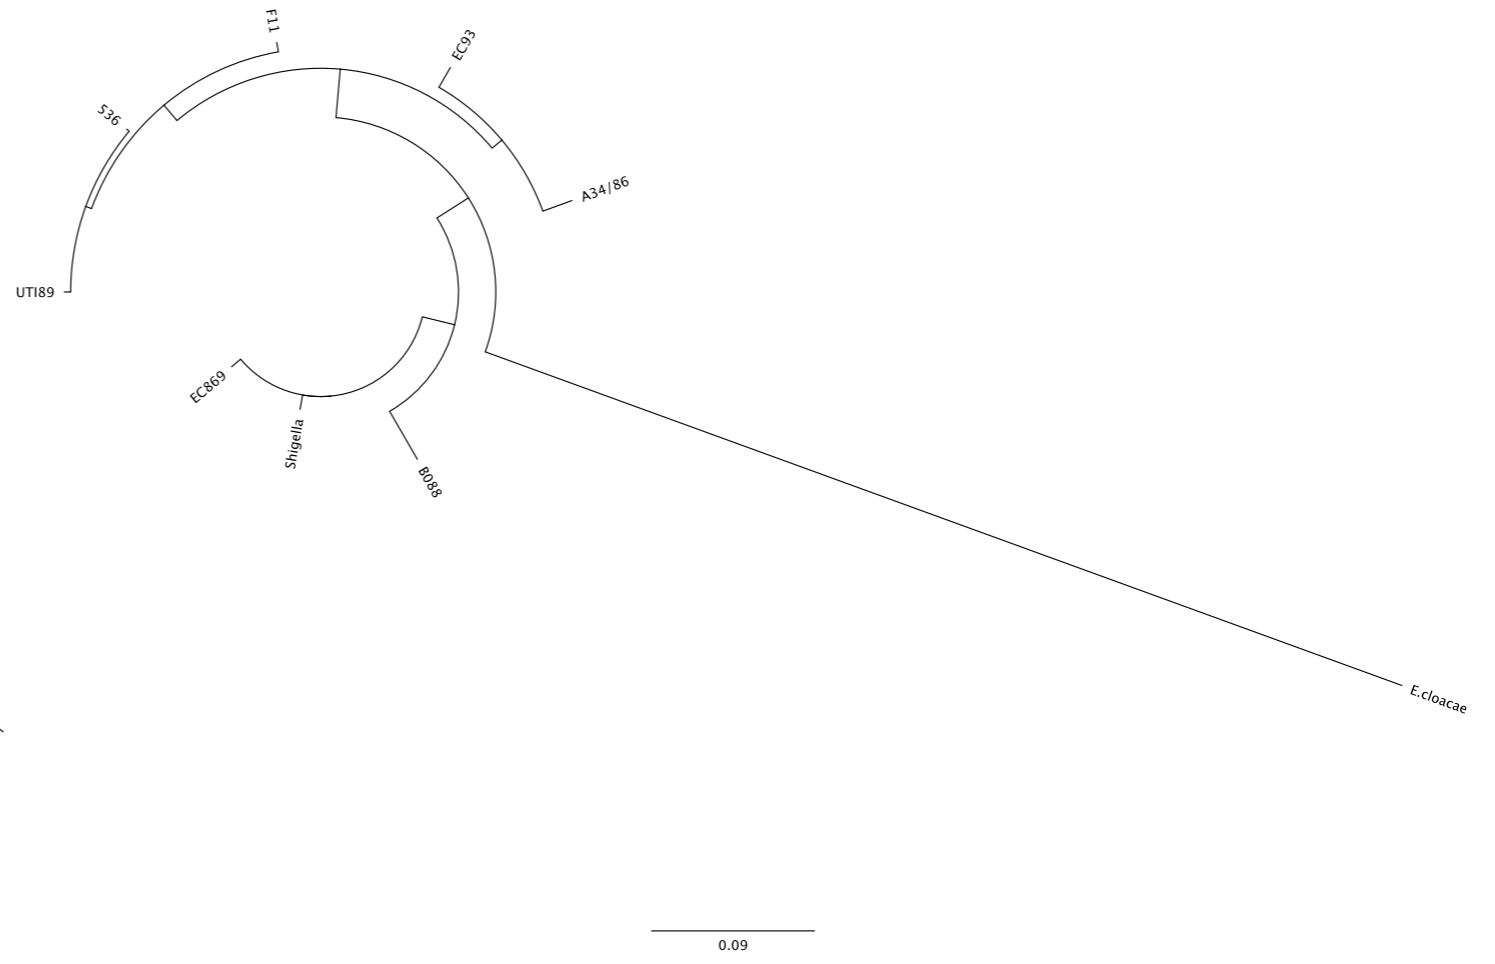

Supplement: supp_77_9_2916__5.pdf [file supp_77_9_2916__5.pdf]

Figure S6. Genomic locations of the mutator prophage in the *E. coli* O157:H7 lineage

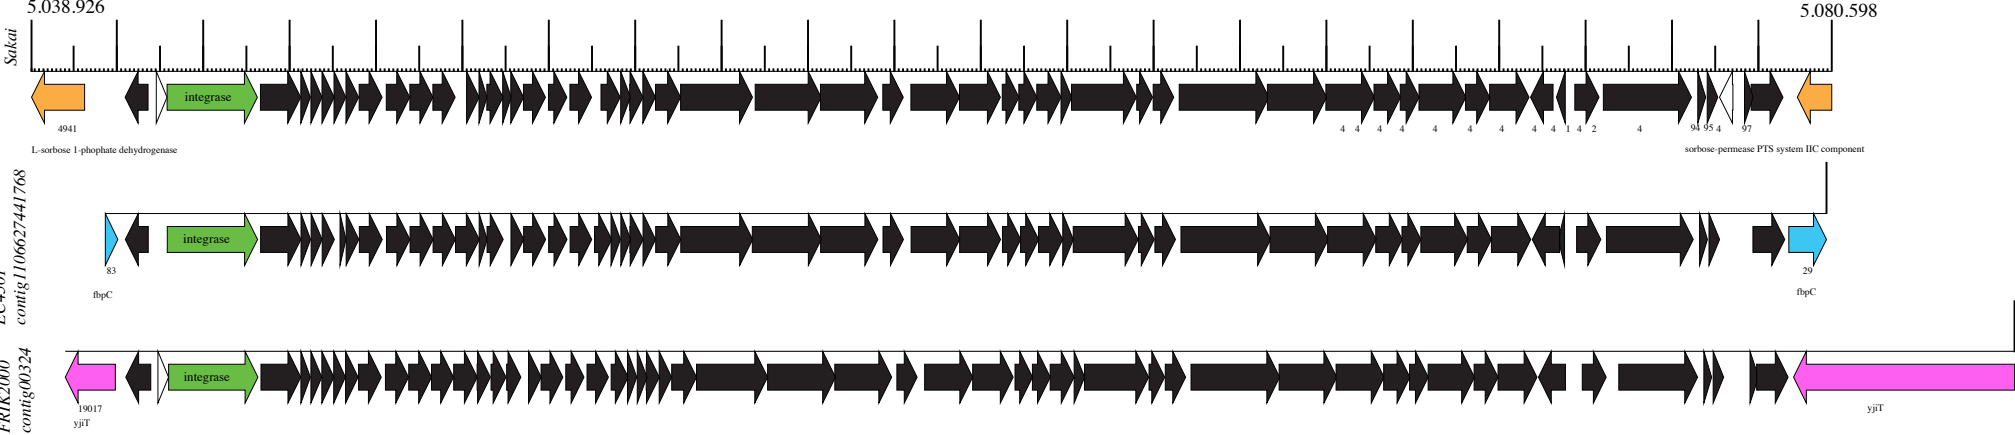

Supplement: supp_77_9_2916__6.pdf [file supp_77_9_2916__6.pdf]
